# Supplementary material for: The Association of Childhood Fitness to Proactive and Reactive Action Monitoring
Source: PubMed Central journal article supplement (PMC4777555; doi:10.1371/journal.pone.0150691), 2016-03-03
Supplement: pone.0150691.s002.pdf [file pone.0150691.s002.pdf]

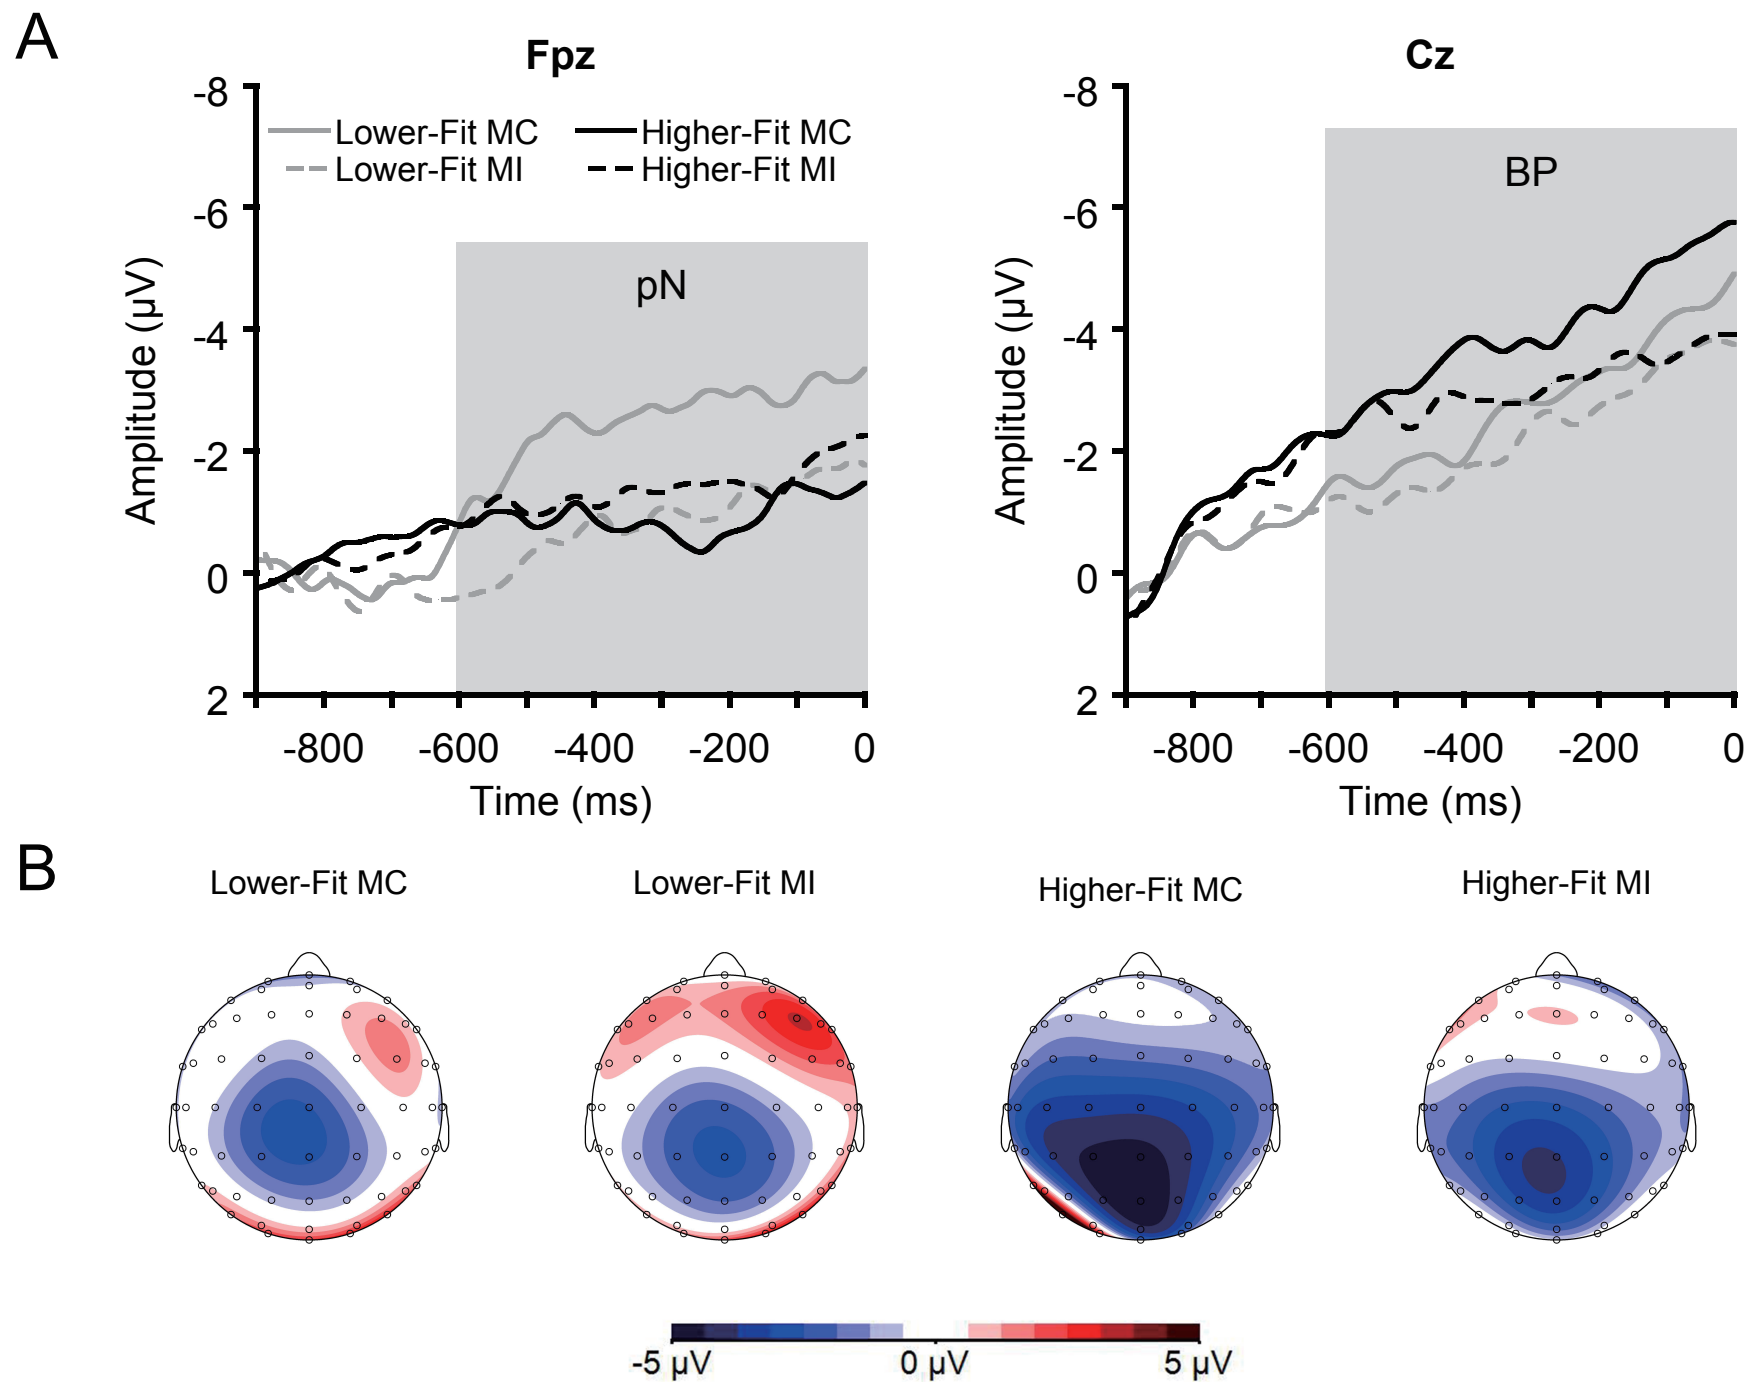

**S1 Figure. A: Grand averaged stimulus-locked ERP waveforms for each condition at Fpz (pN) and Cz (BP) electrode site. B: Topographical maps of the pN/BP amplitudes for each condition.**

A median split was performed on the 20-m shuttle run test percentile scores within each sex to visualize the association between fitness and pN/BP amplitude.
